# Supplementary material for: The Effects of Hyperuricemia on the Prognosis of IgA Nephropathy are More Potent in Females
Source: PubMed Central journal article supplement (PMC7019531; doi:10.3390/jcm9010176), 2020-01-08
Supplement: jcm-09-00176-s001.pdf [file jcm-09-00176-s001.pdf]

# The Effects of Hyperuricemia on the Prognosis of IgA Nephropathy are More Potent in Females

Tae Ryom Oh <sup>1</sup>, Hong Sang Choi <sup>1</sup>, Chang Seong Kim <sup>1</sup>, Kyung Pyo Kang <sup>2</sup>, Young Joo Kwon <sup>3</sup>, Sung Gyun Kim <sup>4</sup>, Seong Kwon Ma <sup>1</sup>, Soo Wan Kim <sup>1,\*†</sup> and Eun Hui Bae <sup>1,\*†</sup>

<sup>1</sup> Department of Internal Medicine, Chonnam National University Medical School, 42 Jebongro, Gwangju 61469, Korea; tryeomoh@daum.net (T.R.O.); hongsang38@hanmail.net (H.S.C.); laminion@hanmail.net (C.S.K.); drmsk@hanmail.net (S.K.M.)

<sup>2</sup> Department of Internal Medicine and Research Institute of Clinical Medicine of Chonbuk National University-Chonbuk National University Hospital, Chonbuk National University Medical School, Jeonju 54907, Korea; kpkang@jbnu.ac.kr

<sup>3</sup> Department of Internal Medicine, Korea University College of Medicine, Seoul 02841, Korea; yjkwon@korea.ac.kr

<sup>4</sup> Department of Internal Medicine, Hallym University Sacred Heart Hospital, Anyang 14068, Korea; sgkim@hallym.ac.kr

\* Correspondence: skimw@chonnam.ac.kr (S.W.K.); Tel.: +82-62-220-6271; baedak76@gmail.com (E.H.B.); Tel.: +82-62-220-6503, Fax: +82-62-225-8578

† These authors have contributed equally to this manuscript as correspondence authors.

## Supplementary Materials

**Figure S1.** Kaplan-Meier survival curve with log-rank test for composite renal outcome by quartiles of uric acid

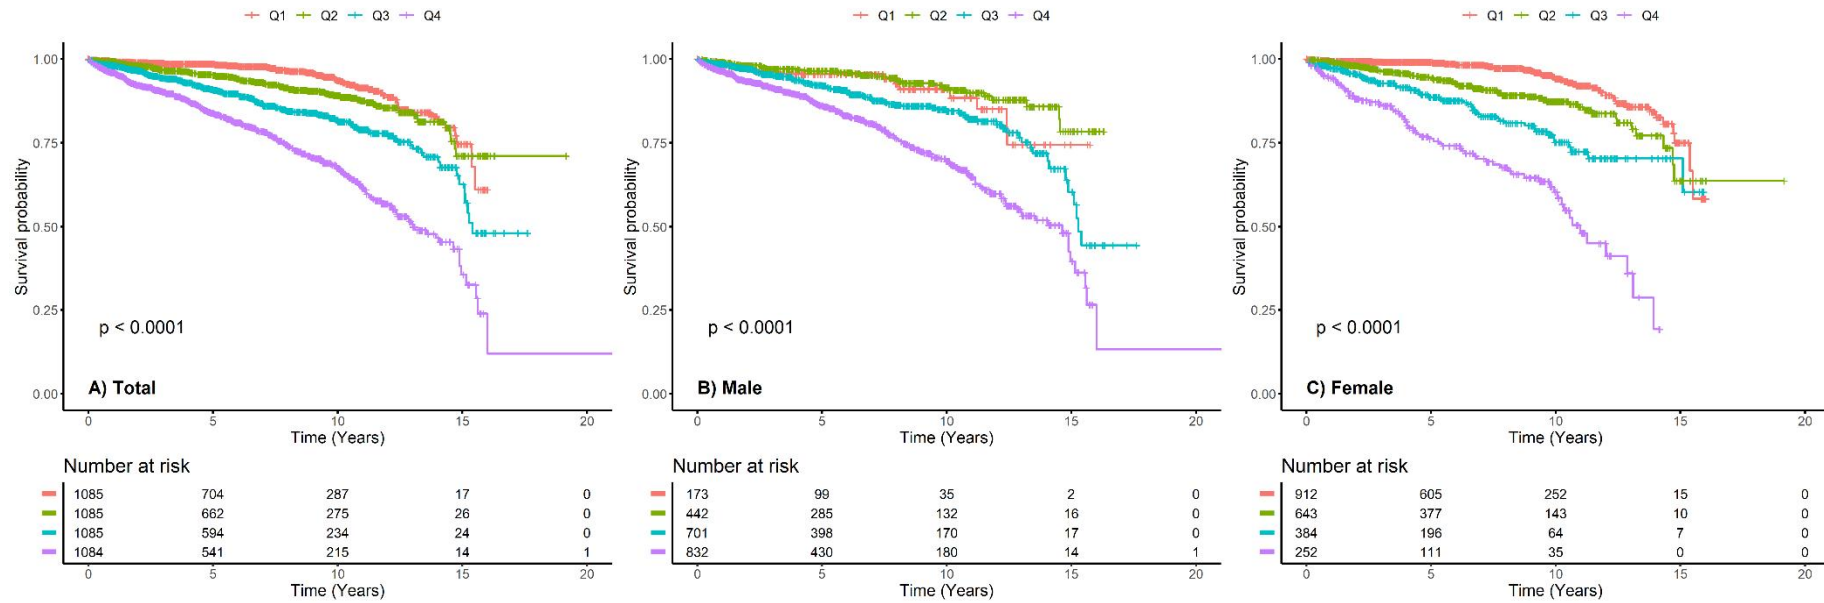

Quartiles 4 showed the highest event incidence in all groups.
